# Supplementary material for: BET Bromodomain Degradation Disrupts Function but Not 3D Formation of RNA Pol2 Clusters
Source: MDPI journal article supplement (doi:10.3390/ph16020199), 2023-01-29
Supplement: s1 [file s1]

Supplemental figures for

# BET bromodomain degradation disrupts function but not 3D formation of RNA Pol2 clusters

Diana H. Chin<sup>\*1</sup>, Issra Osman<sup>\*1</sup>, et al

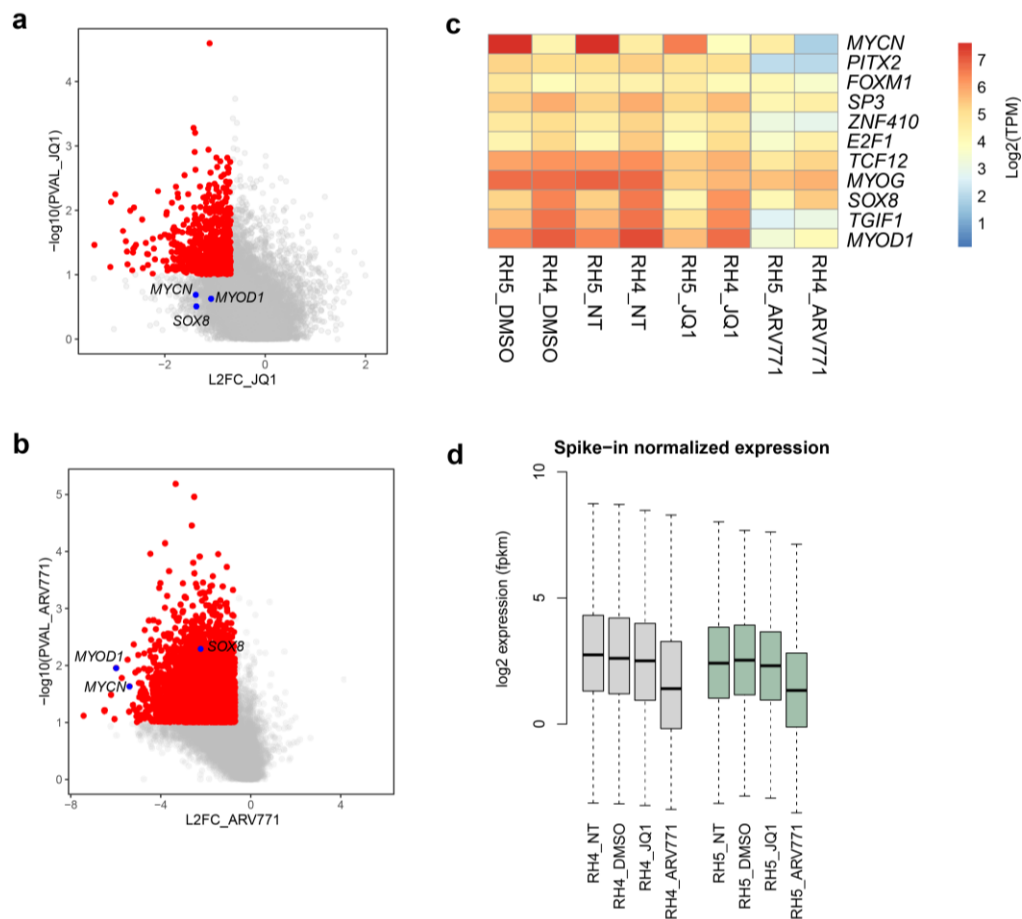

**Supplemental Figure S1:** Gene expression following loss of BET bromodomain proteins shows global decrease with degradation, but not inhibition.

**a-b.** Genes are plotted based on log2 fold change (L2FC) and the negative log10 of the p-value comparing TPM with JQ1 (a) or ARV-771 (b) treatment to TPM with DMSO treatment. Each gene is represented by one dot. Genes with L2FC less than -1 (fold-change < 0.5) and  $-\log_{10}(p\text{-value})$  greater than 1 ( $p\text{-val} < 0.1$ ) are shown in red. CRTFs MYOD1, MYCN, and SOX8 are highlighted.

**c.** Heatmap with log2 of total TPM for key genes in RH4 and RH5 treated with DMSO, JQ1, or ARV771. Red represents more transcripts, blue represents fewer. RH5 harbors amplified MYCN.

**d.** Boxplot with log2 of total FPKM for RH4 (gray) and RH5 (green) treated with DMSO, JQ1, or ARV771.

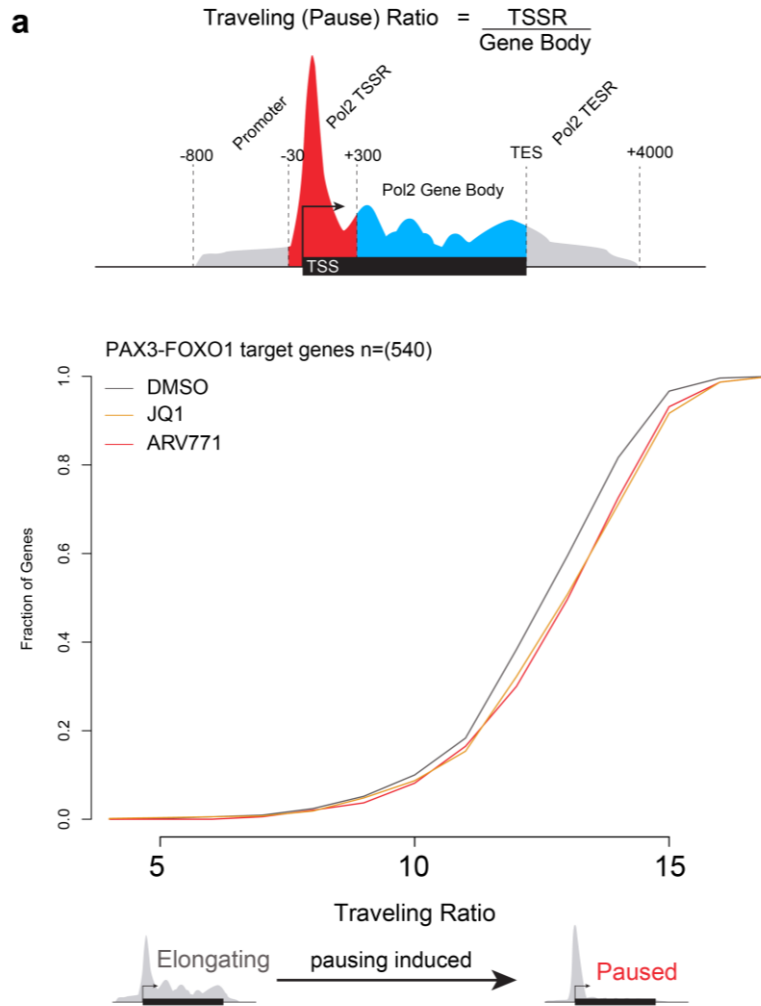

**Supplemental Figure S2:** Pol2 distribution within P3F targets upon the loss of BET bromodomain proteins.

**a.** Diagram of RNA Pol2 distribution as measured by the traveling ratio in a set of P3F target genes for RH4 cells treated with DMSO, JQ1, or ARV771. The traveling ratio is calculated by the ratio of reads at the transcriptional start site region (-30 to +300bp from the TSS) and the gene body (+300 from TSS to TES).

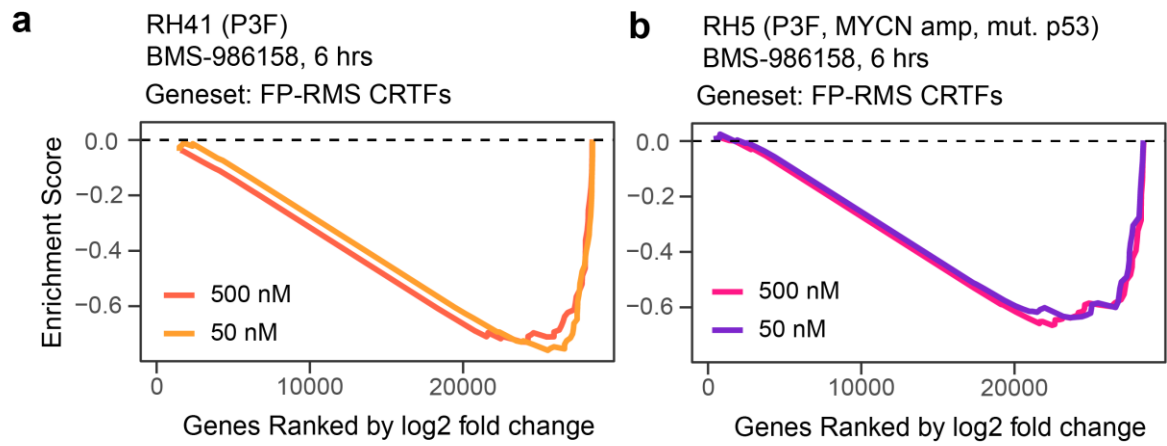

**Supplemental Figure S3:** BMS-986158 gene expression response in FP-RMS.

(a) Gene set enrichment analysis (GSEA) of RH41 and (b) RH5 cells treated shows strong downregulation of FP-RMS CRTFs following BMS-986158 treatment.
